# Supplementary material for: Phosphorylation of mTOR Ser2481 is a key target limiting the efficacy of rapalogs for treating hepatocellular carcinoma
Source: PubMed Central journal article supplement (PMC5216950; doi:10.18632/oncotarget.10161), 2016-06-18
Supplement: oncotarget-07-47403-s001.pdf [file oncotarget-07-47403-s001.pdf]

## Phosphorylation of mTOR Ser2481 is a key target limiting the efficacy of rapalogs for treating hepatocellular carcinoma

### Supplementary Materials

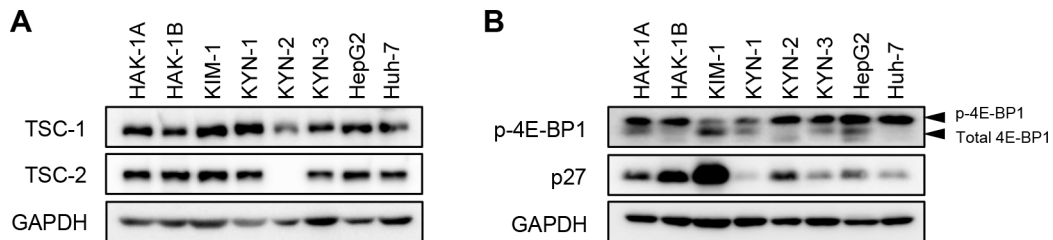

**Supplementary Figure S1: Expression levels of mTORC1 signaling-related molecules in HCC cell lines.** Western blot analysis of the expression in eight human HCC cell lines of TSC-1 and TSC-2 (**A**) and p-4E-BP1 and p27 (**B**).

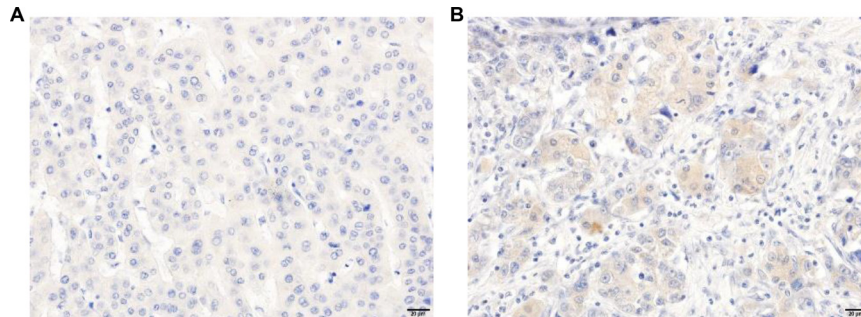

**Supplementary Figure S2: Comparison of the expression level of keratin 19 between HAK-1A and HAK-1B.** IHC analysis of the expression of keratin 19 in HAK-1A (**A**) and HAK-1B (**B**) tissues. Immunohistochemical stain was performed by keratin 19 antibody (BA17, DAKO, Glostrup, Denmark) using the streptavidin-biotin-peroxidase method.
